# Supplementary material
Source: Springer Nature journal article supplement (https://www.springermedizin.de/resource/supplementary/12946_2011_147_MOESM3_ESM.pdf/9555262)

Control group: = 3-0 weeks  
 = 6-0 weeks  
 = 6-3 weeks

↑ = Up regulated  
↓ = Down regulated

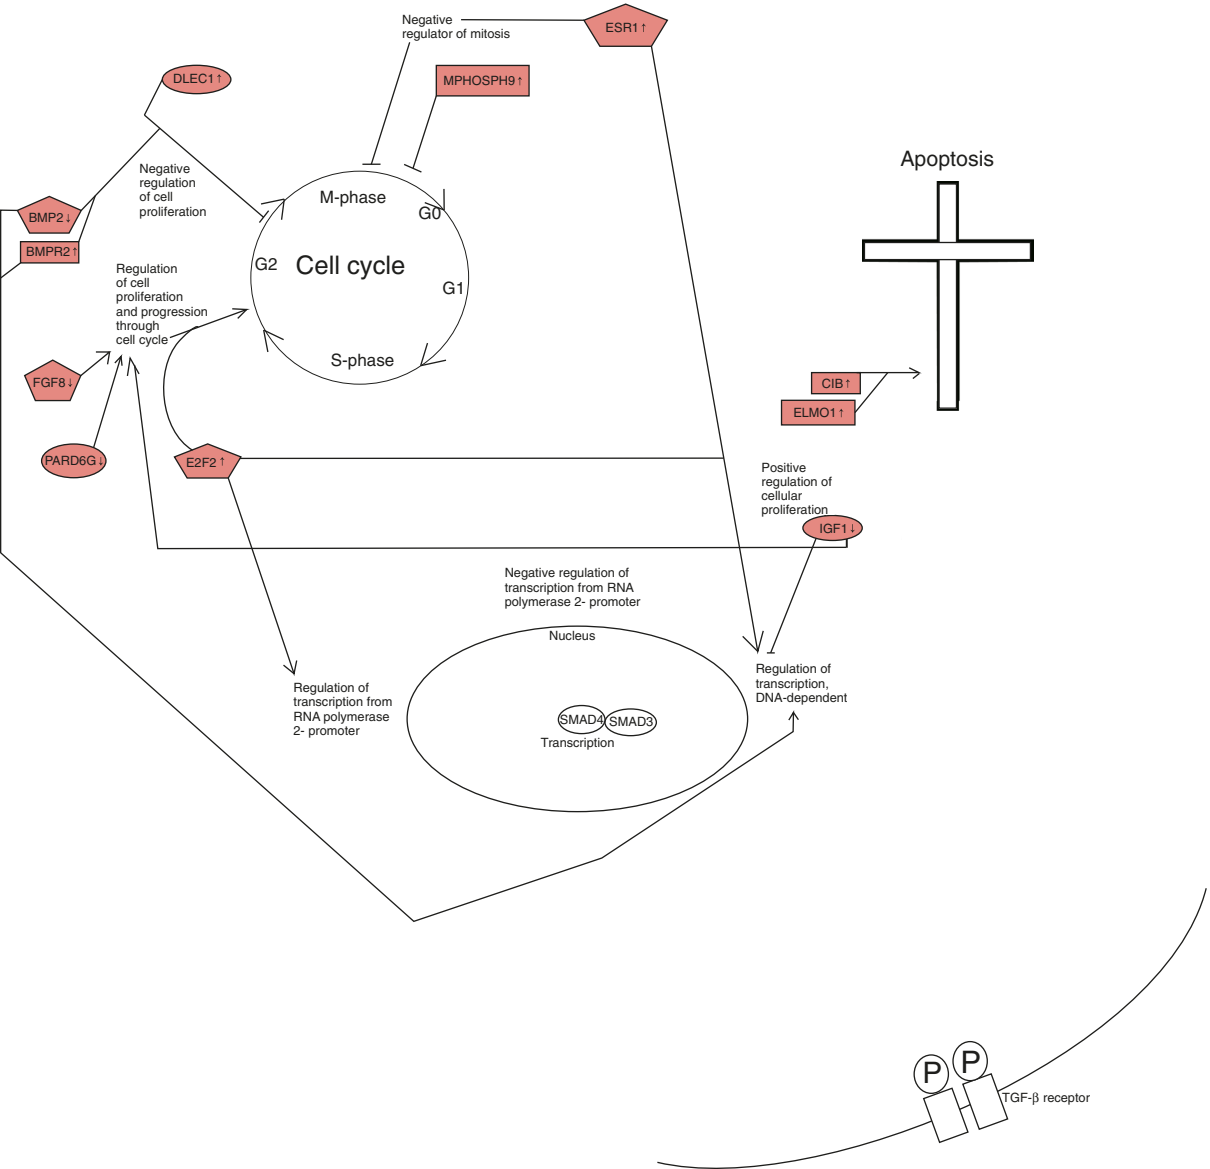

Supplement: MOESM3 [file 9555262]
